# Supplementary material
Source: publisher site journal article supplement (https://www.dovepress.com/article/542983)
Supplement: Supplementary file 1 [file 542983%20Revised%20Supplementary%20Material.docx]

**Figure S1**


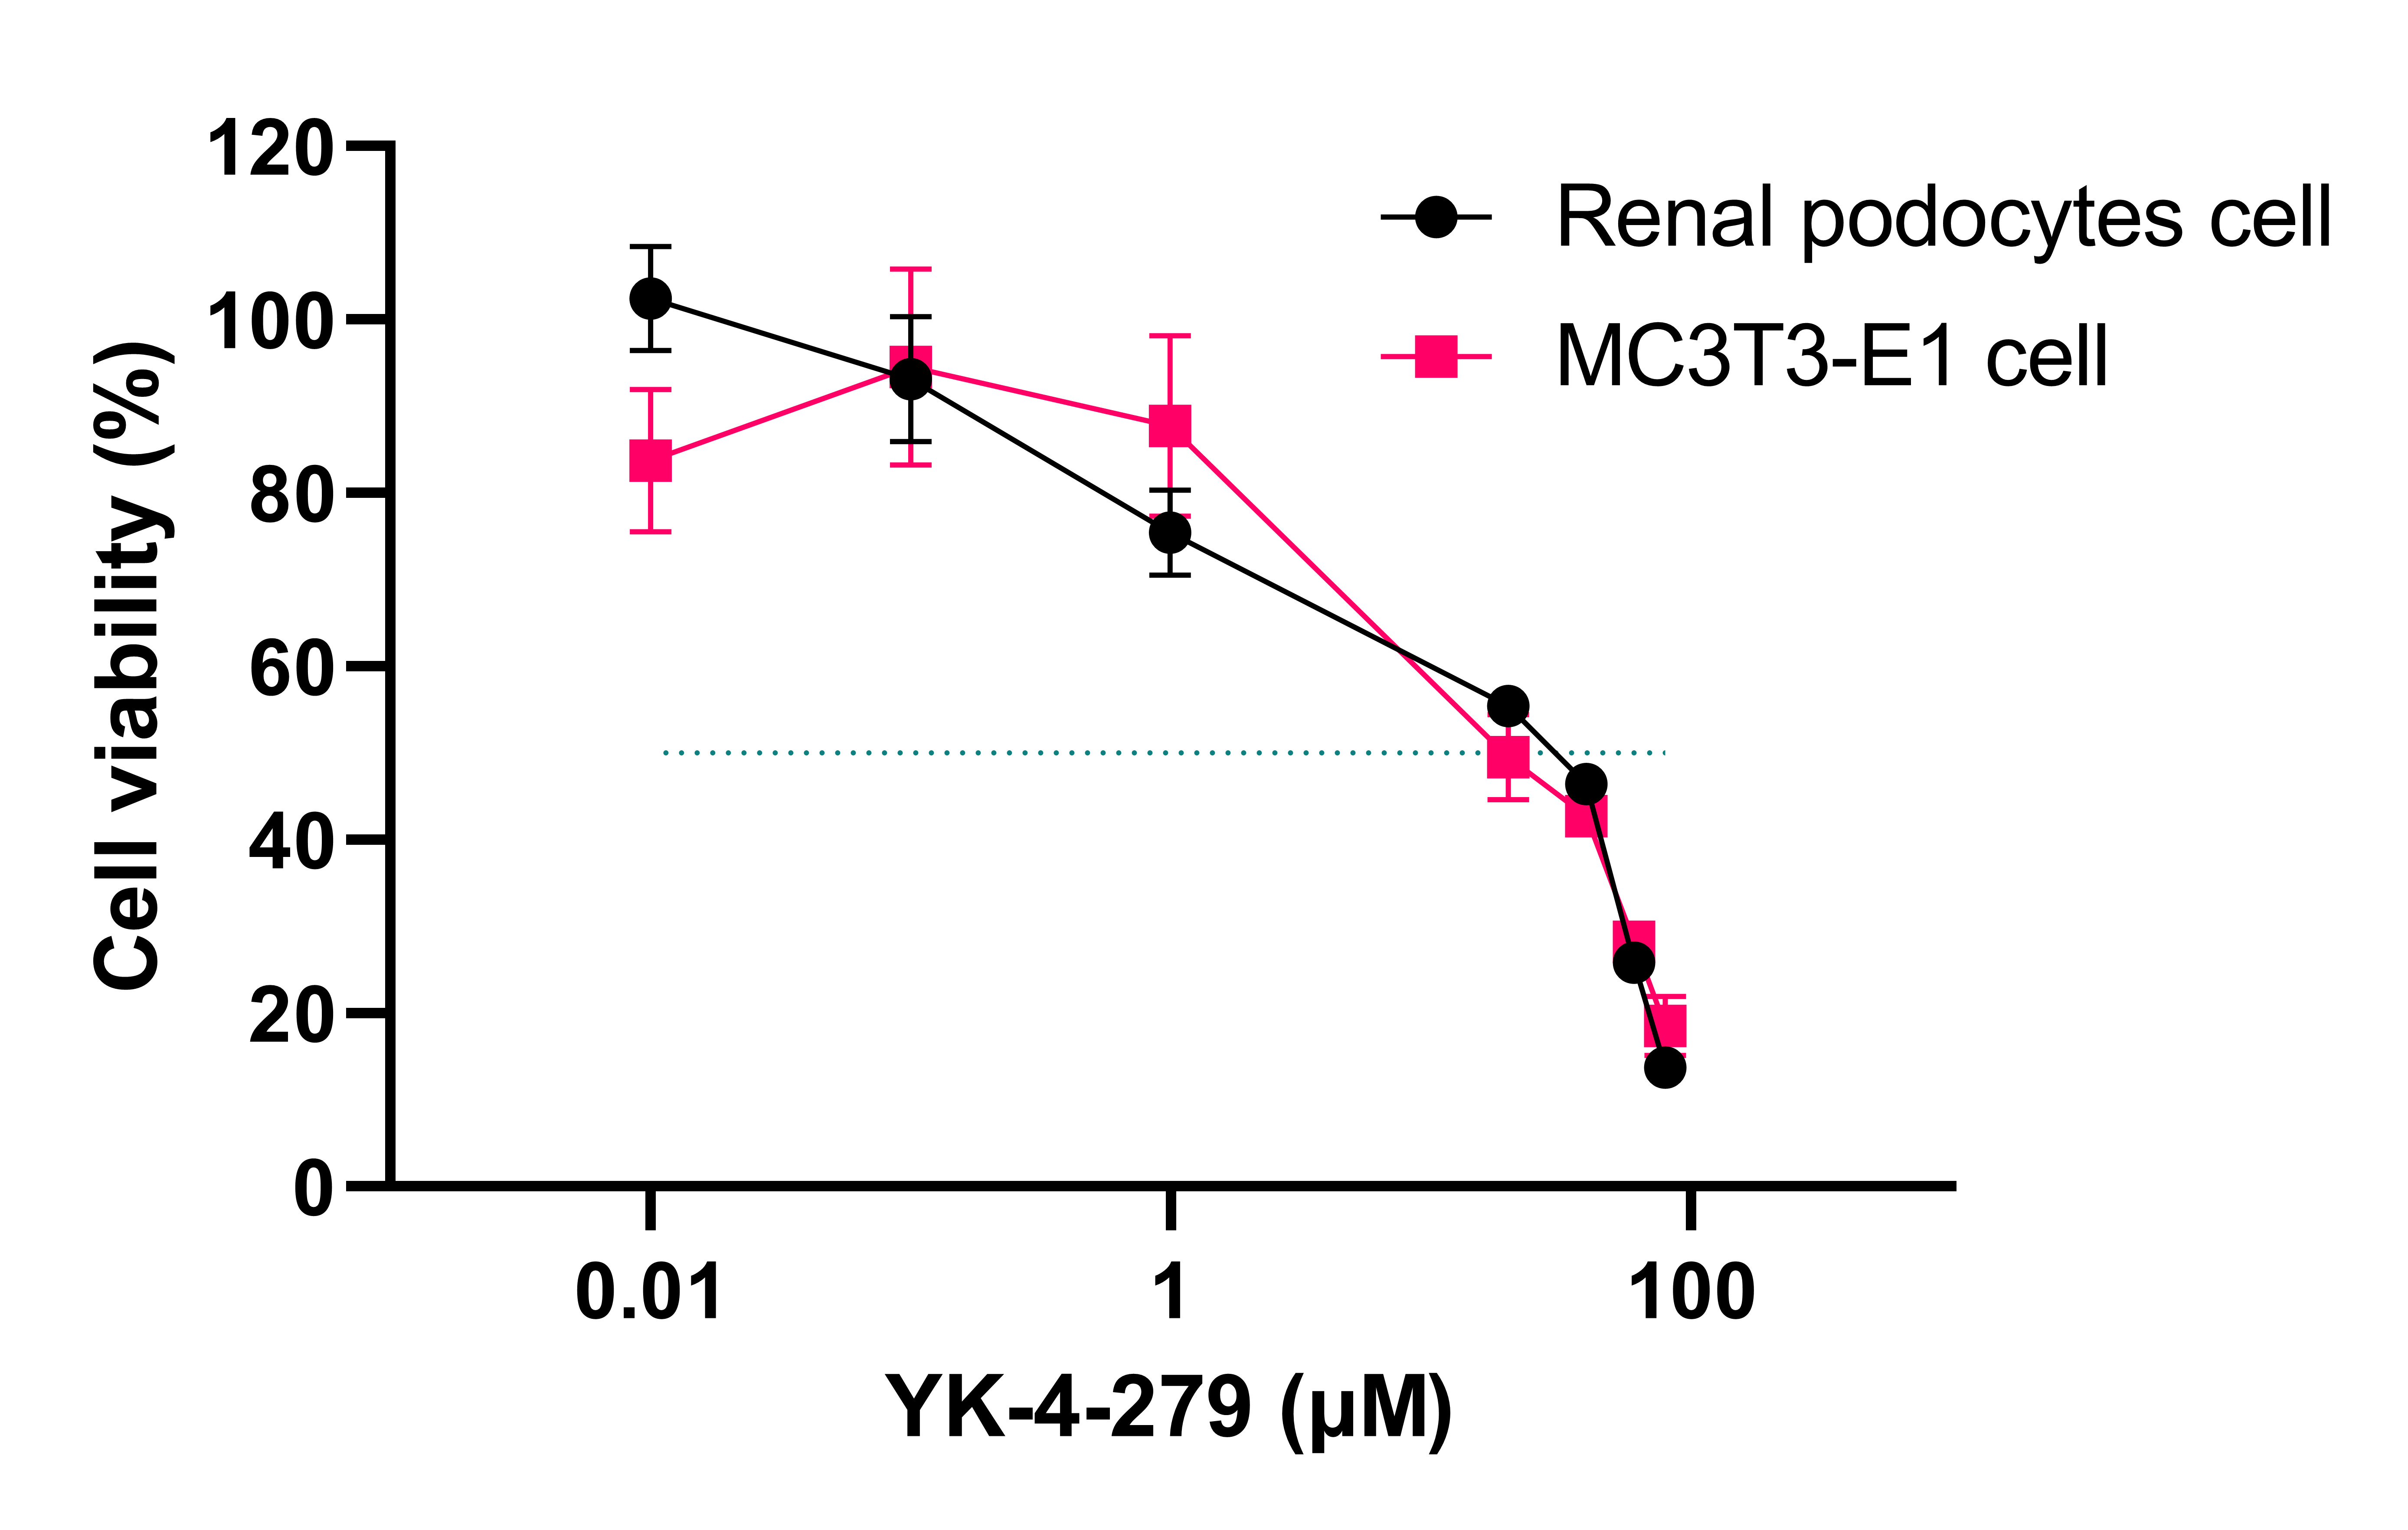


**Figure S1. Effect of YK-4-279 on the proliferation capacity of osteoblast MC3T3-E1 cells and rat renal podocytes.** Cells were treated with different concentrations of YK-4-279 for 24 h. Cell viability was determined using the CCK-8 method. Data are the mean ± standard deviation of five independent experiments.

**Figure S2**


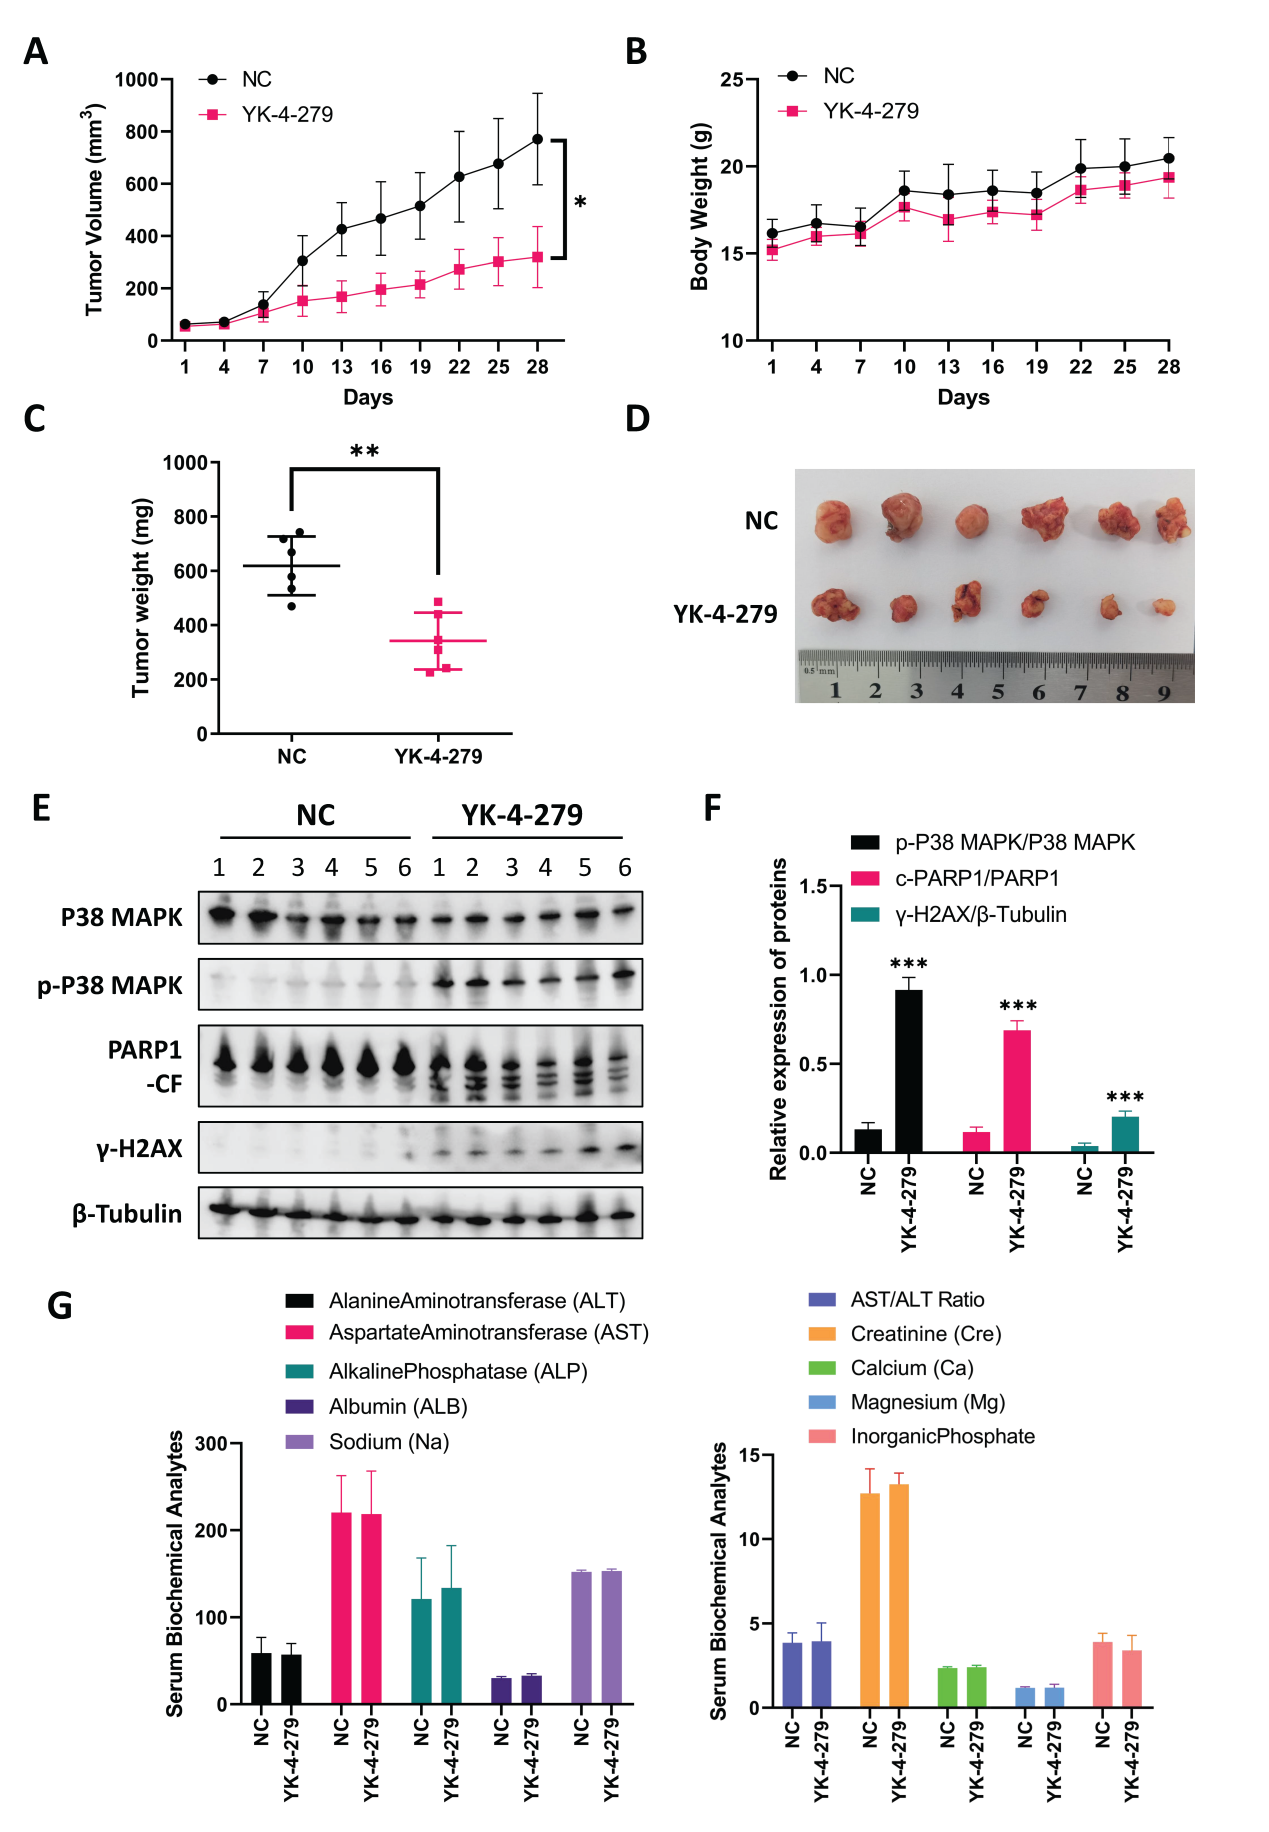


**Figure S2. Anti-tumor effect of YK-4-279 in a nude mouse xenograft model of osteosarcoma MG63.** In this study, the experimental group was treated with YK-4-279 at a dose of 30 mg/kg/day. (A) Tumor volume growth curve. (B) Body weight monitoring of the mice. (C) Measured tumor weight at the end of the study. (D) Photographs of dissected tumors. (E, F) Protein expression of γ-H2AX, PARP1, total P38 MAPK, and its phosphorylated form (p-P38 MAPK) in xenograft tumor tissues was detected by Western blot analysis. (G) Analysis of hepatic and renal function parameters from serum biochemical tests in mice. Data are presented as mean ± SD. **P* < 0.05, ***P* < 0.01, ****P* < 0.001 compared with the control group.
